# Supplementary material
Source: PubMed Central journal article supplement (PMC2688851)
Supplement: 0811514106_0811514106SI.pdf [file 0811514106_0811514106SI.pdf]

# Supporting Information

Fange et al. 10.1073/pnas.0811514106

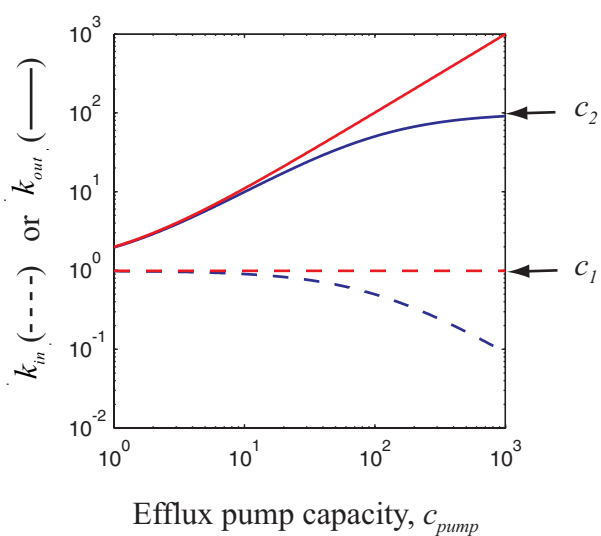

**Fig. S1.** Influx and efflux rate constants,  $k_{in}$  and  $k_{out}$ , as functions of drug efflux pump capacity for drug efflux pumping from the periplasm (blue) and cytoplasm (red), respectively. Parameters used:  $c_1 = 1$ ,  $c_2 = 100$ .

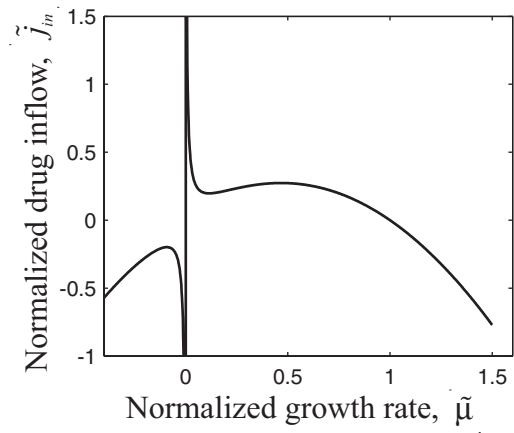

**Fig. S2.** Visualization of Eq. S4. For this particular parameter set, there is one minimum and one maximum for  $\tilde{j}_{in}$  when  $\tilde{j}_{in} > 0$ ,  $\tilde{\mu} > 0$  and one maximum when  $\tilde{\mu} < 0$ . Plotting  $\tilde{j}_{in}$  on the x axis,  $\tilde{\mu}$  on the y axis, and displaying only the  $\tilde{j}_{in} > 0$ ,  $\tilde{\mu} > 0$  region, give the type of plot shown in Fig. 2A. Parameters used:  $\tilde{k}_a = 100$ ,  $\tilde{k}_d = \tilde{k}_{out} = 1$ .

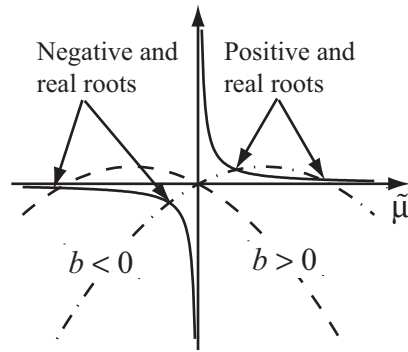

**Fig. S3.** Visualization of the intersections between  $c\tilde{\mu}$  (solid) and  $-a\tilde{\mu}^2 - b\tilde{\mu} = c\tilde{\mu}$ , when  $b > 0$  (dashed) and when  $b < 0$  (dot-dashed) defined in Eq. S12. When  $b < 0$  there can be either one or three real roots to Eq. S5, which are indicated here as intersection between the solid and dot-dashed lines. When  $b > 0$  there can only be one root.





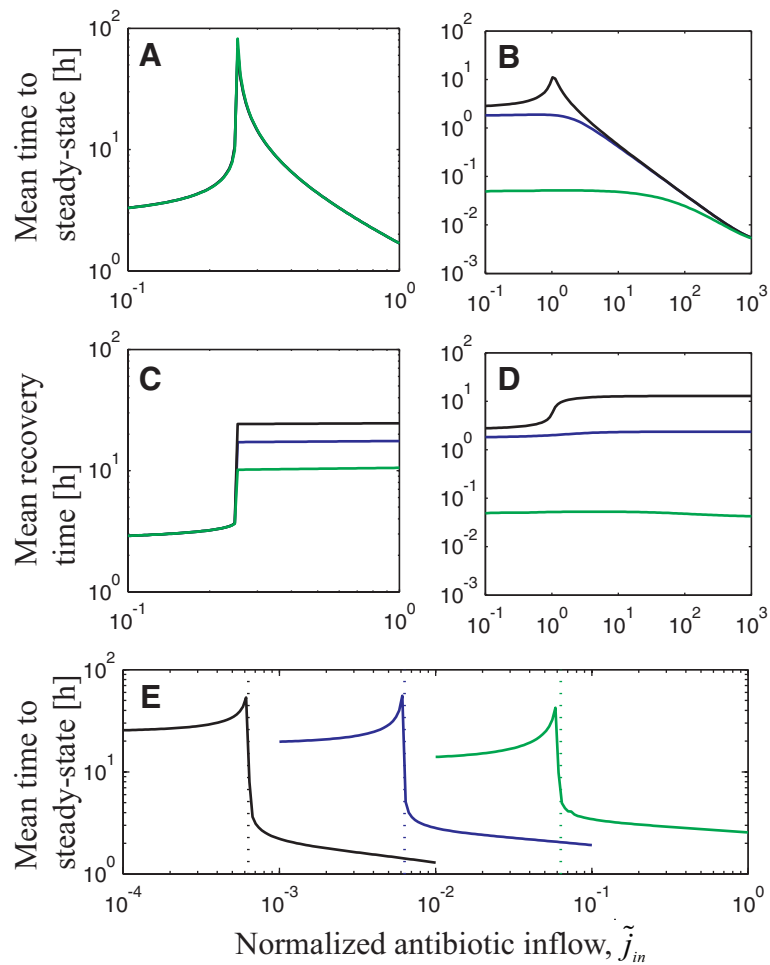

**Fig. S6.** (A and B) Mean time to reach steady state (Eq. S19) (y axis), starting from normalized growth rate  $\tilde{\mu} = 1$  (no internal drug) when  $t = 0$ , as a function of normalized inflow  $\tilde{j}_{in}$  (x axis) when  $t > 0$ . (C and D) Mean time to reach normalized growth rate  $\tilde{\mu} = 1$  (Eq. S19) when  $\tilde{j}_{in} = 0$  for  $t > 0$ , starting from steady state values corresponding to normalized inflow,  $\tilde{j}_{in}$ , defined on the x axis, when  $t = 0$ . (A and C) Drug efflux deficiency as in Fig. S5 A and C. (B and D) Drug efflux proficiency as in Fig. S5 B and D. Color-coding as in Fig. 3.



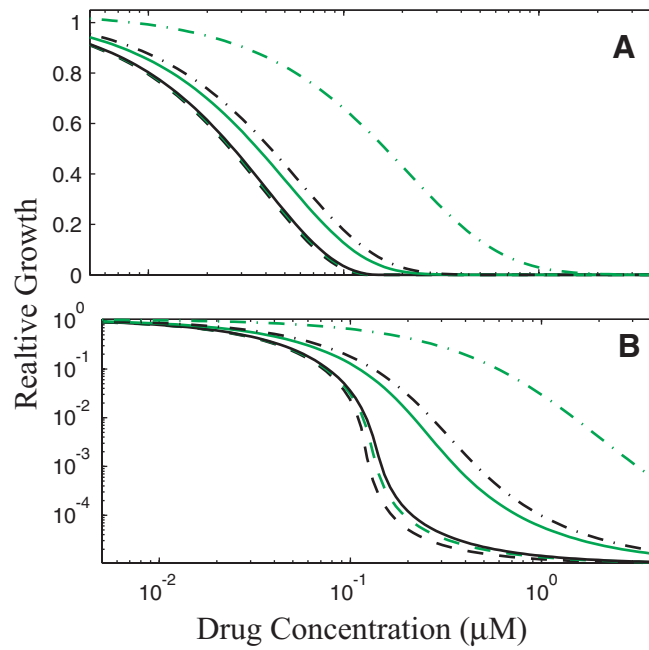

**Fig. S8.** Ratios between the extent of steady state cell growth during 16 h in the presence (growth rate,  $\mu$ ) and absence (growth rate,  $\mu_0 = 2 \times 10^{-4} \text{s}^{-1}$ ) of drug in the medium as functions of the external drug concentration for wild type (black) and target resistance mutant (green) strains in drug efflux pump proficient (dot-dashed,  $k_{\text{out}} = 2 \text{s}^{-1}$ ), intermediate (solid,  $k_{\text{out}} = 0.15 \text{s}^{-1}$ ) and deficient (dashed,  $k_{\text{out}} = 0.01 \text{s}^{-1}$ ) backgrounds. The  $K_D$  values for wild type and target mutant are 1 nM ( $k_a = 10^6 \text{M}^{-1} \cdot \text{s}^{-1}$ ,  $k_d = 10^{-3} \text{s}^{-1}$ ) and 10 nM ( $k_a = 10^6 \text{M}^{-1} \cdot \text{s}^{-1}$ ,  $k_d = 10^{-2} \text{s}^{-1}$ ), respectively. The target concentration is 20  $\mu\text{M}$  and the rate constant,  $k_{\text{in}}$ , for drug inflow is  $0.01 \text{s}^{-1}$ , corresponding to a membrane permeability of  $1.7 \times 10^{-7} \text{cm/s}$  (when  $A/V = 6 \mu\text{m}^{-1}$ ). (A) Growth ratios in linear scale. (B) Growth ratios in logarithmic scale.

## Other Supporting Information Files

[SI Appendix](#)
